# Supplementary material for: Satellite glia modulate sympathetic neuron survival, activity, and autonomic function
Source: eLife. 2022 Aug 23;11:e74295. doi: 10.7554/eLife.74295 (PMC9433091; doi:10.7554/eLife.74295)
Supplement: Figure 1—figure supplement 1—source data 1. [file elife-74295-fig1-figsupp1-data1.xlsx]

## Sheet: Fig1-FS1A
Figure 1- figure supplement 1A source data
single cell RNA sequencing on Fabp7 in ganglionic cells
	Satellite Glia	141.541
	Neurons	5.49709
	Schwann Cells	1.42224
	T Cells	3.5154
	Vascular Endothelial Cells	2.27128
	Fibroblasts	4.36137
	Macrophages	16.4508
	Mural Cells	1.61319
