# Supplementary material for: Satellite glia modulate sympathetic neuron survival, activity, and autonomic function
Source: eLife. 2022 Aug 23;11:e74295. doi: 10.7554/eLife.74295 (PMC9433091; doi:10.7554/eLife.74295)
Supplement: Figure 1—figure supplement 2—source data 1. [file elife-74295-fig1-figsupp2-data1.xlsx]

## Sheet: Fig1-FS2B,C
Figure 1- figure supplement 2B, C source data
5dpi Sox2 cells per mm2
B	Control	BLBP:iDTA
	39381.6	15947.1			t-test
	16044.4	19642.2		p-value	0.4634
	15752.6	16433.3		95% confidence interval	-10447 to 6088
		10404.5
5dpi Sox2 cells associated to neurons
C	Control	BLBP:iDTA
	2.1	1.905
	2.316	1.875
	2.283	1.436			t-test
	2.533	1.526		p-value	0.0058
				95% confidence interval	-0.9871 to -0.2579

## Sheet: Fig1-FS2F
Figure 1- figure supplement 2F source data
Sox2 cells per mm2- binary quantifications
14dpi
	Control	BLBP:iDTA
	13127.2	10210			t-test
	11085.2	6028.79		p-value	0.295
	13807.9	9237.66		95% confidence interval	-4463 to 12339
	12349.3	8265.28

## Sheet: Fig1-FS2G
Figure 1- figure supplement 2G source data
Sox2 cells per mm2- binary quantifications
5dpi
	Control	BLBP:iDTA
	13030	12835.5			t-test
	15460.9	14488.5		p-value	0.9095
	19642.2	15266.5		95% confidence interval	-5262 to 4776
	10307.3	14877.5

## Sheet: Fig1-FS2H
Figure 1- figure supplement 2H source data
qPCR of glial transcripts
		Control			BLBP:iDTA
	Fabp7	1	0	5	0.444044	0.104645	5
	Fasn	1	0	5	0.401014	0.191057	3
	Apoe	1	0	5	0.601457	0.0832115	3
	Kcnj10	1	0	5	0.552516	0.111179	3
	mutliple t-test with Bonferroni-Dunn correction
		p-value
	Fabp7	0.002869
	Fasn	0.020529
	Apoe	0.002407
	Kcnj10	0.005996
