# Supplementary material for: Satellite glia modulate sympathetic neuron survival, activity, and autonomic function
Source: eLife. 2022 Aug 23;11:e74295. doi: 10.7554/eLife.74295 (PMC9433091; doi:10.7554/eLife.74295)
Supplement: Figure 1—figure supplement 3—source data 1. [file elife-74295-fig1-figsupp3-data1.xlsx]

## Sheet: Fig1-FS3B
Figure 1- figure supplement 3B source data
IBA1+ cells per mm2
	Control	BLBP:iDTA
	1687.17	847.532
	2648.87	1736.73
	955.702	2507.23
	1520.03	1134.99
	903.129	854.181
statistical test	t-test
p value	0.7842
95% confidence interval	-1159 to 905.7

## Sheet: Fig1-FS3D
Figure 1- figure supplement 3D Source data
EdU+ cells per SCG
	Control	BLBP:iDTA
	7.5	19.5
	12.5	24.5
	61	40.5
	59	18
	27.5	38
statistical test	t-test
p value	0.6766
95% confidence interval	-36.29 to 25.49
