# Supplementary material for: Satellite glia modulate sympathetic neuron survival, activity, and autonomic function
Source: eLife. 2022 Aug 23;11:e74295. doi: 10.7554/eLife.74295 (PMC9433091; doi:10.7554/eLife.74295)
Supplement: Figure 1—source data 1. [file elife-74295-fig1-data1.xlsx]

## Sheet: Fig 1C,D
Figure 1D Source data
TUNEL+ cells/SCG
	Control	BLBP:iDTA
	129	456.167
	350.333	712.5
	297	304.25
	164.333

## Sheet: Fig 1G
Figure 1G Source data
Sox10+/TUNEL+/Sox10+ cells
	Control	BLBP:iDTA
	8.274	24.675
	12.356	9.571
	9.836	18.065
	5.736	21.668
	3.077
	12.294

## Sheet: Fig1H
Figure 1H Source data
TrkA+/TUNEL+/TrkA+ cells %
	Control	BLBP:iDTA
	3.84	10.638
	3.151	4.718
	3.729	1.92
	5.277	4.351

## Sheet: Fig1J
Figure 1J Source data
Sox2+ cells per mm2
	Control	BLBP:iDTA
	15461	9043.18
	12349.3	7779.08
	6126.03	5737.07
	15655.4	5153.64
	15460.9	3695.06
		4375.73
	t-test
p-value	0.0048
95% confidence interval	-11330 to -2763

## Sheet: Fig1L
Figure 1L Source data
Glial nuclei/neuron
	Control	BLBP:iDTA
	1.5	1.6
	3.75	1.6
	2.7	1.5
	2.4				t-test
	1.56			p-value	0.0482
	3			95% confidence interval	-1.826 to -0.01084
