# Supplementary material for: Satellite glia modulate sympathetic neuron survival, activity, and autonomic function
Source: eLife. 2022 Aug 23;11:e74295. doi: 10.7554/eLife.74295 (PMC9433091; doi:10.7554/eLife.74295)
Supplement: Figure 2—figure supplement 1—source data 1. [file elife-74295-fig2-figsupp1-data1.xlsx]

## Sheet: Fig 2-FS1B
Figure 2-FS1B Source Data
Neuronal Cell counts 5dpi
	Control	BLBP:iDTA
	13.7175	11.865			t-test
	11.3775	9.175			p-value	0.3005
	17.575	16.4125			95% con. Inter	-6.097 to 2.182
	14.7	11.5025
	13.61

## Sheet: Fig 2-FS1D,E
Figure 2-FS1D, E Source Data
Sympathetic axon branching and length
D	Axon Length
	Control	BLBP:iDTA
	28927.4	18847.9
	14395.1	22587		t-test
	10003.7	19610.5		p-value	0.3839
	11747.3	19159.8		95% con. Inter	-4929 to 11487
	14126.5	15388.7
E	Branch Points
	Control	BLBP:iDTA
	400	722
	563	512
	522	300		t-test
	814	1128		p-value	0.3982
		1114		95% con. Inter	-293.9 to 654.8
