# Supplementary material for: Satellite glia modulate sympathetic neuron survival, activity, and autonomic function
Source: eLife. 2022 Aug 23;11:e74295. doi: 10.7554/eLife.74295 (PMC9433091; doi:10.7554/eLife.74295)
Supplement: Figure 2—source data 1. [file elife-74295-fig2-data1.xlsx]

## Sheet: Fig 2B
Fig2B Source Data
qPCR of noradrenergic enzymes
	Control				BLBP:iDTA
TH	1	1	1	1	0.0593394	0.00546211	0.409528	0.00499746
DBH	1	1	1		0.0154821	0.0153035	0
	mulitple t-test with Bonferroni-Dunn correction
	p-value
TH	0.000206
DBH	<0.000001

## Sheet: Fig 2C, D
Fig2C,D Source Data
C
Histogram of soma sizes
		Control								BLBP:iDTA
	<100	41.475	17.778	29.283	37.723	17.526	6.63	3.883	0	51.572	24.18	85.593	54.682	24.561	25.501
	100-200	52.074	58.73	63.551	53.795	64.948	40.331	40.777	21.192	47.17	66.803	14.407	40.075	57.895	57.593
	200-300	5.991	21.587	7.165	8.259	15.464	32.597	33.01	71.523	1.258	9.016	0	4.869	13.158	14.613
	300-400	0.461	1.905	0	0.223	1.031	11.602	15.534	7.285	0	0	0	0.375	4.386	1.719
	>400	0	0	0	0	1.031	8.84	6.796	0	0	0	0	0	0	0.573
	Two way anova, Bonferroni correction
		p-value
	<100	0.0081
	100-200	>0.9999
	200-300	0.1313
	300-400	>0.9999
	>400	>0.9999
D
Median Soma sizes
	Control	BLBP:iDTA
	149.098	134.579
	113.875	94.326		t-test
	209.732	98.98		p-value	0.0408
	111.265	126.076		95% conf inter	-85.51 to -2.262
	147.899	119.598
	120.929	134.231
	214.218
	227.792

## Sheet: Fig 2G
Fig2G Source Data
Neurons/SCG at 14dpi
	Control	BLBP:iDTA
	16.1075	11.1675		t-test
	16.405	9.6325		p-value	0.003
	16.0475	11.555		95% con. Inter	-6.354 to -2.449
	13.265	13.7525
		12.82
