# Supplementary material for: Satellite glia modulate sympathetic neuron survival, activity, and autonomic function
Source: eLife. 2022 Aug 23;11:e74295. doi: 10.7554/eLife.74295 (PMC9433091; doi:10.7554/eLife.74295)
Supplement: Figure 3—figure supplement 1—source data 1. [file elife-74295-fig3-figsupp1-data1.xlsx]

## Sheet: Fig3-FS1A
Figure 3-figure supplement 1A
pupil constriction assay
		Control					BLBP:iDTA
	0.01	0.924235	0.856212	0.978782	0.987976	0.965766	1.01859	0.950258	1.00997	0.942505	0.972709	0.889747
	0.1	0.681272	0.653067	0.890116	0.601102	0.785976	0.726136	0.829842	0.688737	0.918134	0.782896	0.473378
	1	0.494395	0.533958	0.428063	0.183153	0.548592	0.767354	0.492415	0.677361	0.320968	0.511597	0.510113
	10	0.216562	0.187425	0.223457	0.177837	0.115284	0.213306	0.170188	0.368236	0.137037	0.144651	0.145884
	100	0.115641	0.0997333	0.184834	0.0882783	0.185968	0.20057	0.189255	0.152932	0.193997	0.0946574	0.142
	1000	0.0452979	0.0531758	0.0557995	0.0941379	0.0367061	0.0414472	0.0730479	0.149513	0.0427492	0.0505915	0.053545
	two way anova with Bonferroni correction
		p-value	95.00% CI of diff.
	0.01	>0.9999	-0.1774 to 0.1347
	0.1	>0.9999	-0.1703 to 0.1418
	1	0.3662	-0.2651 to 0.04705
	10	>0.9999	-0.1685 to 0.1436
	100	>0.9999	-0.1834 to 0.1287
	1000	>0.9999	-0.1675 to 0.1446

## Sheet: Fig3- FS1C,D
Figure 3-figure supplement 1C,D
Heart rate variability in mice lacking cre and treated with tamoxifen or cornoil
	C	Heart variability
		Vehicle					Tamoxifen
	12	559.87	616.29	605.83	598.31	600.69	585.21	553.23	631.57	599.9
	24	502.8	588.21	515.66	556.61	592.31	534.75	497.78	581.85	605.92
	36	513.29	607.71	593.45	532.27	631.5	560.47	540.04	624.9	590.36
	48	512.78	629.65	508.75	550.68	640.48	535.02	530.48	585.4	579.66
	two way anova with Bonferroni correction
		p-value	95% conf
	12	>0.9999	-73.05 to 80.49
	24	>0.9999	-80.73 to 72.81
	36	>0.9999	-80.07 to 73.47
	48	>0.9999	-65.94 to 87.60
	D	Average Heart rate
		Vehicle	Tamoxifen
		560.46	606.85		t-test
		522.19	553.86		p-value	0.7777
		610.47	530.38		95% conf	-69.99 to 54.53
		542.65	566.21
		624.49

## Sheet: Fig3- FS1E
Figure 3-figure supplement 1E
Adrenergic expression in hearts
		Control							BLBP:iDTA
	Adra1A	1	1	1	1	1	1		0.434058	0.865006	0.0645719	1.18664	1.12105
	Adra1B	1	1	1	1	1	1		0.213052	0.310934	0.015496	1.00493	1.90266
	Adra1D	1	1	1	1	1	1		0.187833	0.376915	0.0132239	1.30111	1.57326
	Adra2A	1	1	1	1	1	1			0.00126491	0.00024279	1.15026	0.265617
	Adra2B	1	1	1	1	1	1		0.0298472	0.151064	0.00198366	1.00556	0.814487
	Adra2C	1	1	1	1	1	1			0.0012204	5.9576e-05		0.244361
	Adrb1	1	1	1	1	1	1		0.189414	0.375073	0.0282101	0.563105	0.183317
	Adrb2	1	1	1	1	1	1		0.0694087	0.0840313	0.0162354	0.631782	0.806808
	Adrb3	0	0	0	0	0	0		1	4.8036e-07	9.9102e-08	0.361526	0.183317
	Multiple t-test with Bonferroni-Dunn correction
		p-value
	Adra1A	>0.999999
	Adra1B	>0.999999
	Adra1D	>0.999999
	Adra2A	0.154467
	Adra2B	0.107787
	Adra2C	5e-06
	Adrb1	9.1e-05
	Adrb2	0.012425
	Adrb3	0.880616
