# Supplementary material for: Satellite glia modulate sympathetic neuron survival, activity, and autonomic function
Source: eLife. 2022 Aug 23;11:e74295. doi: 10.7554/eLife.74295 (PMC9433091; doi:10.7554/eLife.74295)
Supplement: Figure 3—source data 1. [file elife-74295-fig3-data1.xlsx]

## Sheet: Fig 3B
Figure 3B source data
Pupil Diameter
	Control	BLBP:iDTA
	4.81287	5.71411			t-test
	5.25579	5.50911			p-value	0.0324
	4.71731	5.98011			95% conf interval	0.06315 to 1.143
	5.20458	5.455
	5.987	6.129
	4.948

## Sheet: Fig 3C,D
Figure 3C,D source data
	C	Heart rate variability
			Control					BLBP:iDTA
		12	590.9	582.8	582.8	587.3	569.8	607.8	678.7	662.1	648.9	564.9	613.1
		24	625.3	616.8	616.8	604.3	512.7	634.5	684.8	682.8	615.8	602.8	632.7
		36	610.5	566.4	566.4	583.8	550.9	638.7	700.6	680.5	670.2	590.5	606.7
		48	581.7	629.7	629.7	596.8	548.6	644.8	712.9	654.4	689	640.1	622.6
		60	610.9	596.2	596.2			650.8	699.3	669.7	668.5	621.6	595.5
		Two way ANOVA with Bonferroni-Dunn Correction
			p-value	95% conf
		12	0.1671	-103.6 to 10.54
		24	0.1579	-104.1 to 10.02
		36	0.0071	-129.3 to -15.20
		48	0.0229	-120.4 to -6.265
		60	0.2515	-116.4 to 16.84
	D	Average Heart rate
					t-test
		Control	BLBP:iDTA		p-value	0.01
		603.86	669.9		95% conf	17.12 to 95.29
		598.38	658.48
		596.183	609.917
		593.05	609.383
		545.5	629.6
			684.3

## Sheet: Fig 3E, F
Figure 3E,F source data
	E	Heart rate variability following 6-OHDA
			Control					BLBP:iDTA
		12	673.24	593.31	608.69	561.93	597.56	577.46	676.32	623.78	516.2
		24	599.66	557.85	593.51	558.2	585.47	575.18	658.13	609.56	514.47
		36	636.81	552.42	599.3	570.33	436.51	566.52	643.31	622.61	485.7
		48	592.64	490.71	609.15	582.29		613.57	613.99	593.26
		60	586.41	450.76	571.61	561.37		554.44	563.77	535.65
		Two way ANOVA with Bonferroni-Dunn Correction
			p-value	95% conf
		12	0.9998	-91.24 to 108.3
		24	0.9995	-110.1 to 89.35
		36	0.9867	-120.2 to 79.28
		48	0.896	-151.8 to 75.32
		60	0.9999	-122.3 to 104.8
	F	Average heart rate following 6-OHDA
		Control	BLBP:iDTA			t-test
		621.05	583.19			p-value	0.4321
		604.07	596.97			95% conf	-107.2 to 58.79
		593.09	631.11
		598.215	505.45
		600.528

## Sheet: Fig 3G
Figure 3G source data
NE ELISA from plasma
	Control	BLBP:iDTA
	0.829689	1.56366
	1.0271	2.59675
	5.97622	10.9539			t-test
	5.06084	4.93181			p-value	0.0404
	8.21891	7.34521			95% conf	0.1176 to 4.792
	7.34468	8.87473
	6.5258	8.90852
	3.01933	6.08786
	2.87234	5.52658
	4.56842	6.08786
	0.994851	11.0985
		6.59062
		6.22893

## Sheet: Fig 3I
Figure 3I source data
cFOS+TH+/TH+ neurons
		Control	BLBP:iDTA
		0	6.439		t-test
		0	16.929		p-value	0.0474
		7.396	29.248		95% conf	0.3122 to 36.13
			30.127
