# Supplementary material for: Satellite glia modulate sympathetic neuron survival, activity, and autonomic function
Source: eLife. 2022 Aug 23;11:e74295. doi: 10.7554/eLife.74295 (PMC9433091; doi:10.7554/eLife.74295)
Supplement: Figure 4—figure supplement 1—source data 1. [file elife-74295-fig4-figsupp1-data1.xlsx]

## Sheet: Fig 4- FS1A
Figure 4-figure supplement 1A source data
single cell RNA sequencing of Kcnj10 transcripts
	Satellite Glia	2.95679
	Neurons	0.13636
	Schwann Cells	0.300871
	T Cells	0.125161
	Endothelial Cells	0.107966
	Fibroblasts	0.111867
	Macrophages	0.522219
	Mural Cells	0.0754963

## Sheet: Fig 4- FS1D
Figure 4-figure supplement 1D source data
Sox2+ cells per mm2 from binary quantifications
	Control	Kir4.1 cKO
	14294.1	14196.8		t-test
	16238.8	20031.1		p-value	0.295
	10988	26643.4		95% conf	-4463 to 12339
	21684.2	18086.4

## Sheet: Fig 4- FS1E
Figure 4-figure supplement 1E source data
qPCR of Fabp7 transcripts in control and Kir4.1 cKO SCGs
	Control	Kir4.1 cKO		t-test
	1	0.586633		p-value	0.332
	0.902731	1.01197		95% conf	-0.4630 to 0.1902
	1.10775	1
	1
