# Supplementary material for: Satellite glia modulate sympathetic neuron survival, activity, and autonomic function
Source: eLife. 2022 Aug 23;11:e74295. doi: 10.7554/eLife.74295 (PMC9433091; doi:10.7554/eLife.74295)
Supplement: Figure 4—source data 1. [file elife-74295-fig4-data1.xlsx]

## Sheet: Fig 4B
Figure 4B Source Data
qPCR of Kcnj10 knockdown
	Control	Kir4.1 cKO
	1.0583	0.502543		t-test
	0.944915	0.150379		p-value	0.0486
	1	0.0960518		95% conf inte	-7.042 to -0.03097

## Sheet: Fig 4D
Figure 4D Source Data
Sox2+ cells per mm2
	Control	Kir4.1 cKO
	13030	6806.7
	12057.6	13030		t-test
	7779.08	10307.3		p-value	0.5512
	9140.42	7001.18		95% conf inte	-5928 to 3497

## Sheet: Fig 4F
Figure 4F Source Data
cFos+TH+/ TH+ neurons%
	Control	Kir4.1 cKO
	0	15.501		t-test
	0	47.314		p-value	0.0444
	0	17.314		95% conf inte	"0.8974 to 47.66"
	9.716

## Sheet: Fig 4H
Figure 4H Source Data
qPCR of noradrenergic enzymes
	Control				Kir4.1 cKO
TH	1	1	1	1	0.788733	0.322737	0.174179
DBH	1	1	1	1	0.126476	0.0703332	0.145008
	Multiple t-test with Bonferri correction
	p-value
TH	0.028308
DBH	<0.000001
