# Supplementary material for: Satellite glia modulate sympathetic neuron survival, activity, and autonomic function
Source: eLife. 2022 Aug 23;11:e74295. doi: 10.7554/eLife.74295 (PMC9433091; doi:10.7554/eLife.74295)
Supplement: Figure 5—figure supplement 1—source data 1. [file elife-74295-fig5-figsupp1-data1.xlsx]

## Sheet: Fig5-FS1C
Figure 5- figure supplement 1C source data
TUNEL+TrkA+/TrkA+ cells%
	Control	Kir4.1 cKO
	0.786	46.712		t-test
	15.831	24.17		p-value	0.045
	2.844	19.708		95% conf	0.5388 to 36.29
	6.124	9.013
		24.452

## Sheet: Fig5-FS1E
Figure 5- figure supplement 1E source data
TUNEL+Sox10+/Sox10+ cells%
	Control	Kir4.1 cKO
	11.85	6.01		t-test
	5.859	9.887		p-value	0.8281
	17.19	13.724		95% conf	-11.05 to 13.21
		21.229

## Sheet: Fig5-FS1G
Figure 5- figure supplement 1G source data
Innervation Density of Salivary gland (%Control)
	Control	Kir4.1 cKO
	83.213	48.728
	111.603	119.217			t-test
	92.025	120.743			p-value	0.2841
	127.482	207.465			95% conf	-27.44 to 83.11
	79.359	143.002
	106.318

## Sheet: Fig5-FS1I
Figure 5- figure supplement 1I source data
Pupil area (mm2)
	Control	Kir4.1 cKO
	4.545	4.129
	3.696	4.195		t-test
	4.169	4.116		p-value	0.1833
	3.394	3.974		95% conf	-0.1341 to 0.6384
	3.659	3.501
	4.195	4.234
	3.836	4.583
	3.811	3.332
	3.952	4.056
	4.363

## Sheet: Fig5-FS1J
Figure 5- figure supplement 1J source data
Circulating NE
	Control	Kir4.1 cKO
	1.71649	1.23351
	2.67882	0.565678
	5.50641	3.39967			t-test
	5.827	7.82276			p-value	0.6481
	9.30338	6.27611			95% conf inte	-3.000 to 4.694
	0.999802	11.8792
	5.3432	11.6783
		10.4695
		0.885308
		1.34426
		3.22759
		5.16886

## Sheet: Fig5-FS1K
Figure 5- figure supplement 1K source data
Pupillary light reflexes
		Control						Kir4.1 cKO
	0.01	1.04831	1.00454	0.961849	1.0975	1.00525	1.00954	0.975445	1.01838	1.01439	0.94309	1.02179	1.02665
	0.1	0.742838	0.964053	1.05228	0.736411	1.10694	0.789344	0.643678	1.00002	0.977033	0.894294	1.06257	0.692407
	1	0.356057	0.391526	1.00917	0.330362	1	0.44164	0.292032	0.953913	0.403604	0.344692	1.06542	0.34103
	10	0.448717	0.274929	0.981337	0.331235	0.951131	0.281207	0.16258	0.873504	0.382472	0.33174	0.920382	0.12218
	100	0.099472	0.183063	0.170287	0.238129	0.768689	0.214164	0.115346	0.748718	0.532374	0.529588	0.539257	0.0895564
	1000	0.0281003	0.06957	0.228005	0.135226	0.199049	0.141842	0.051221	0.232953	0.121807	0.0884204	0.159627	0.0613084
		two way anova with Bonferroni-Dunn correction
		p-value	95% conf inter
	0.01	>0.9999	-0.3475 to 0.3899
	0.1	>0.9999	-0.3484 to 0.3890
	1	>0.9999	-0.3474 to 0.3901
	10	>0.9999	-0.2894 to 0.4480
	100	>0.9999	-0.5156 to 0.2219
	1000	>0.9999	-0.3543 to 0.3831
