# Supplementary material for: Satellite glia modulate sympathetic neuron survival, activity, and autonomic function
Source: eLife. 2022 Aug 23;11:e74295. doi: 10.7554/eLife.74295 (PMC9433091; doi:10.7554/eLife.74295)
Supplement: Figure 5—source data 1. [file elife-74295-fig5-data1.xlsx]

## Sheet: Fig5A,B
Figure 5A,B source data
Soma sizes in control and Kir4.1 cKO neurons
A	Histogram of soma sizes
		Control			Kir4.1 cKO
	<100	18.367	17.886	10.553	27.273	36.095	40.566	23.944	42.396
	100-200	53.741	68.293	48.241	67.273	49.704	50.629	50.704	48.848
	200-300	20.408	13.008	24.623	5.455	8.876	8.491	17.84	7.834
	300-400	5.442	0.813	12.563	0	4.734	0.314	6.573	0.922
	>400	2.041	0	4.02	0	0.592	0	0.939	0
		Two way Anova with Bonferri-Dunn correction
		p-value	95% conf
	<100	0.0008	-30.23 to -6.672
	100-200	>0.9999	-8.454 to 15.11
	200-300	0.159	-2.133 to 21.43
	300-400	>0.9999	-8.016 to 15.54
	>400	>0.9999	-10.07 to 13.49
B	Median soma sizes
	Control	Kir4.1 cKO
	147.527	119.226		t-test
	137.019	116.013		p-value	0.0139
	180.781	113.251		95% conf	-63.49 to -10.66
		131.401
		110.269

## Sheet: Fig5E
Figure 5E source data
TUNEL+ cells/SCG
	Control	Kir4.1 cKO		t-test
	196	1482.5		p-value	0.003
	259	1746		95% conf	715.3 to 1806
	85	1093

## Sheet: Fig5G
Figure 5G source data
Neuronal counts/SCG
	Control	Kir4.1 cKO
	14.545	12.9875		t-test
	18.585	14.015		p-value	0.0486
	14.745	10.905		95% conf	-7.042 to -0.03097
		11.78

## Sheet: Fig5H,I
Figure 5H,I source data
H	Heart rate variability
		Control						Kir4.1 cKO
	12	619.7	583.721	595.229	516.04	574.28		560.8	611.6	566.033	552.454	578.97	561.34
	24	558.1	590.129	541.272	501.29	567.29		556.6	621.7	615.061	577.259	580.74	525.69
	36	585.9	586.266	535.233	512.39	562.34		550.2	646.2	567.189	567.575	577.65	544.98
	48	574.8	628.9	539.405	498.13	563.87		560	633.7	575.207	577.474	588.9	521.52
	60	617.3	587.305	528.257				588.7	624	563.893	550.981
		Two way Anova with Bonferri-Dunn correction
		p-value	95% conf
	12	>0.9999	-52.95 to 64.80
	24	>0.9999	-86.77 to 30.98
	36	>0.9999	-78.08 to 39.67
	48	>0.9999	-73.99 to 43.76
	60	>0.9999	-78.53 to 69.99
I	Average heart rate
	Control	Kir4.1 cKO
	595.45	572.283		t-test
	604.71	563.929		p-value	0.535
	536.81	577.81		95% conf	-40.49 to 67.92
	496.48	560.85
	562.48	589.63
