# Supplementary figures and images for: Satellite glia modulate sympathetic neuron survival, activity, and autonomic function
Source: eLife journal article supplement (doi:10.7554/elife.74295), 2022-08-23

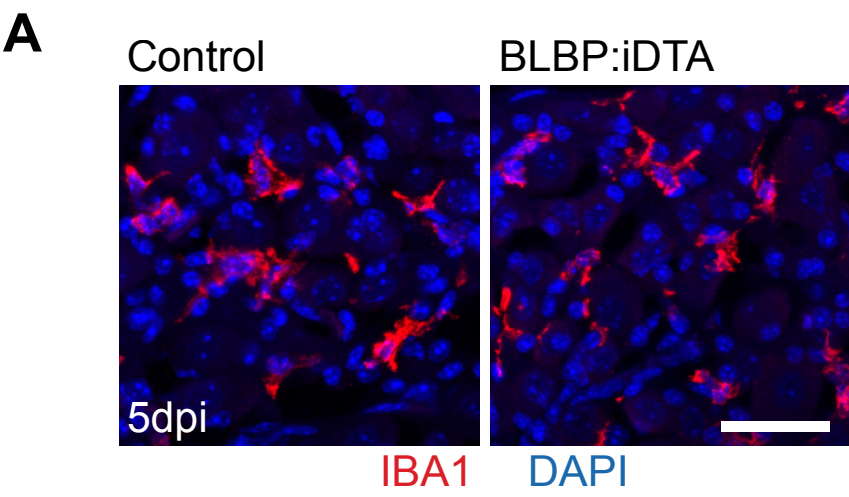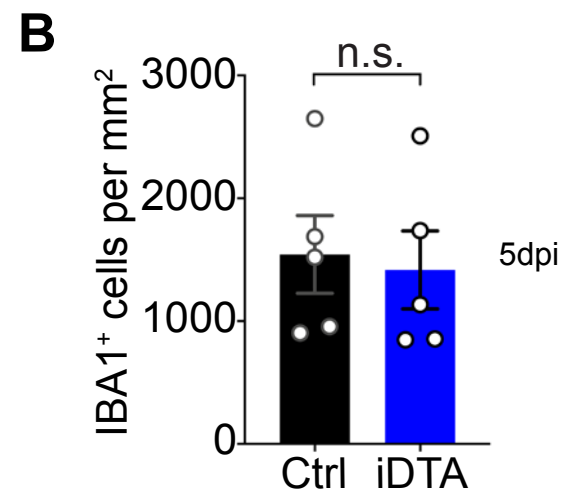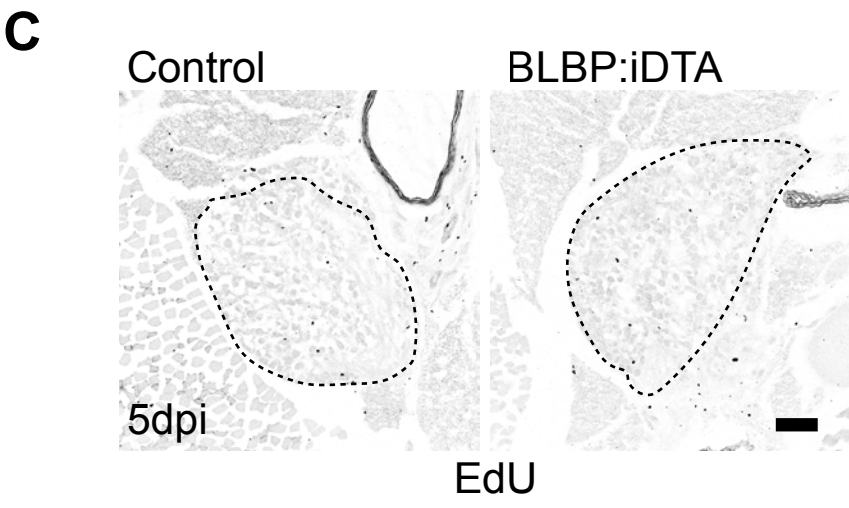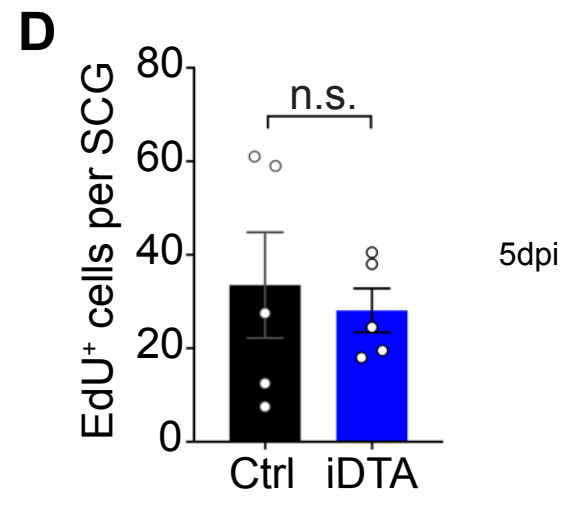

Supplement: supp [file elife-74295-supp-v1.zip]

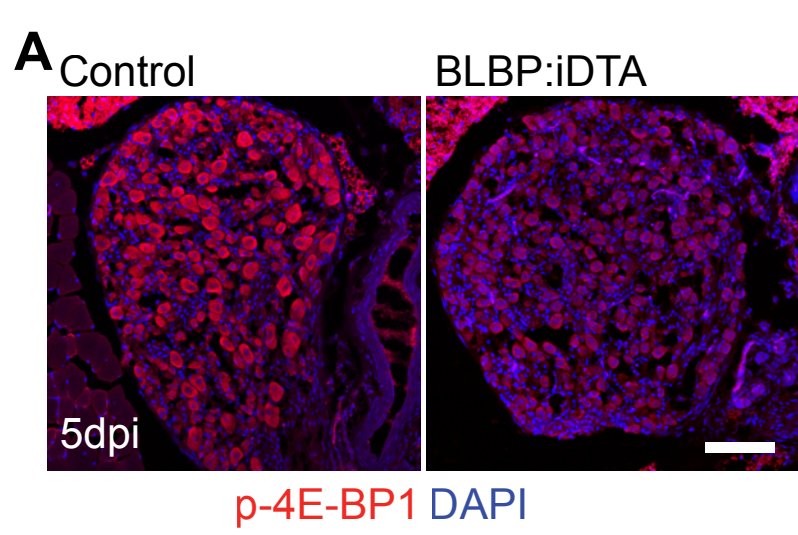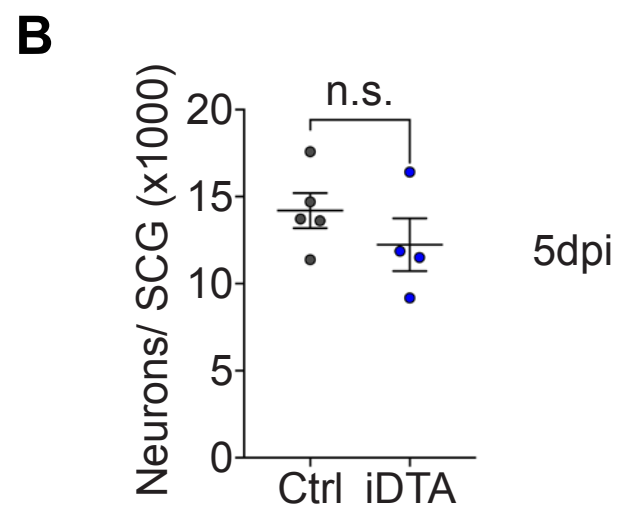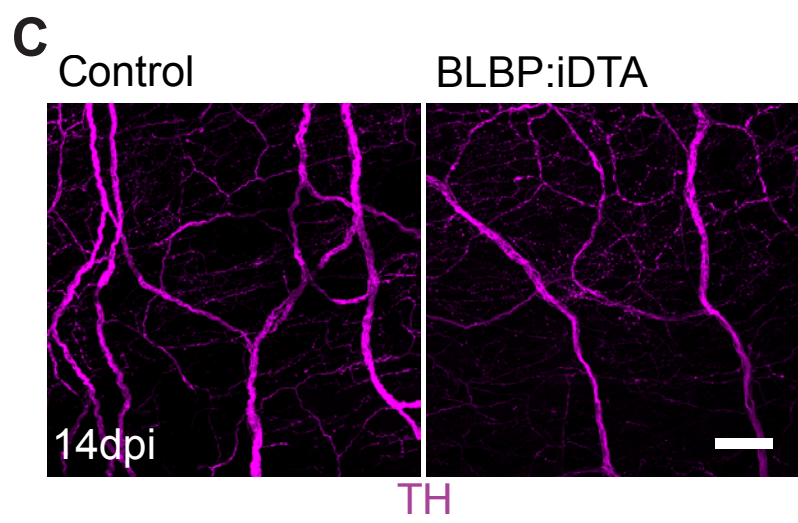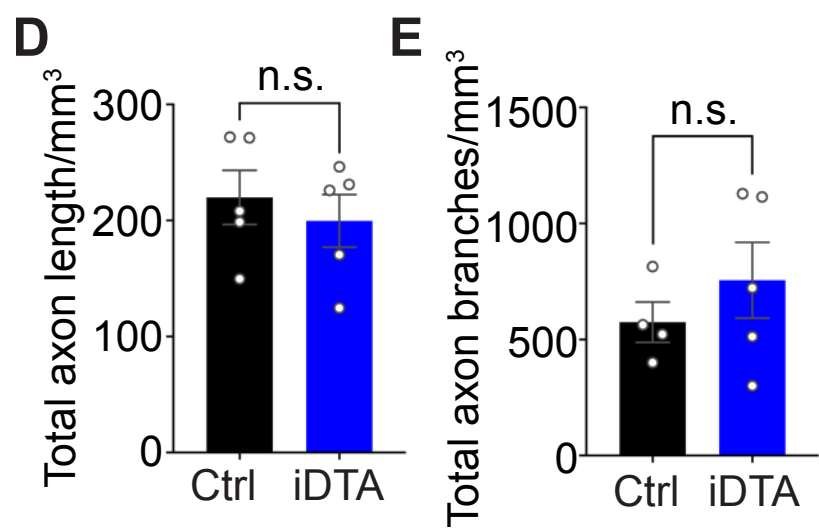

Supplement: supp [file elife-74295-supp-v1.zip]

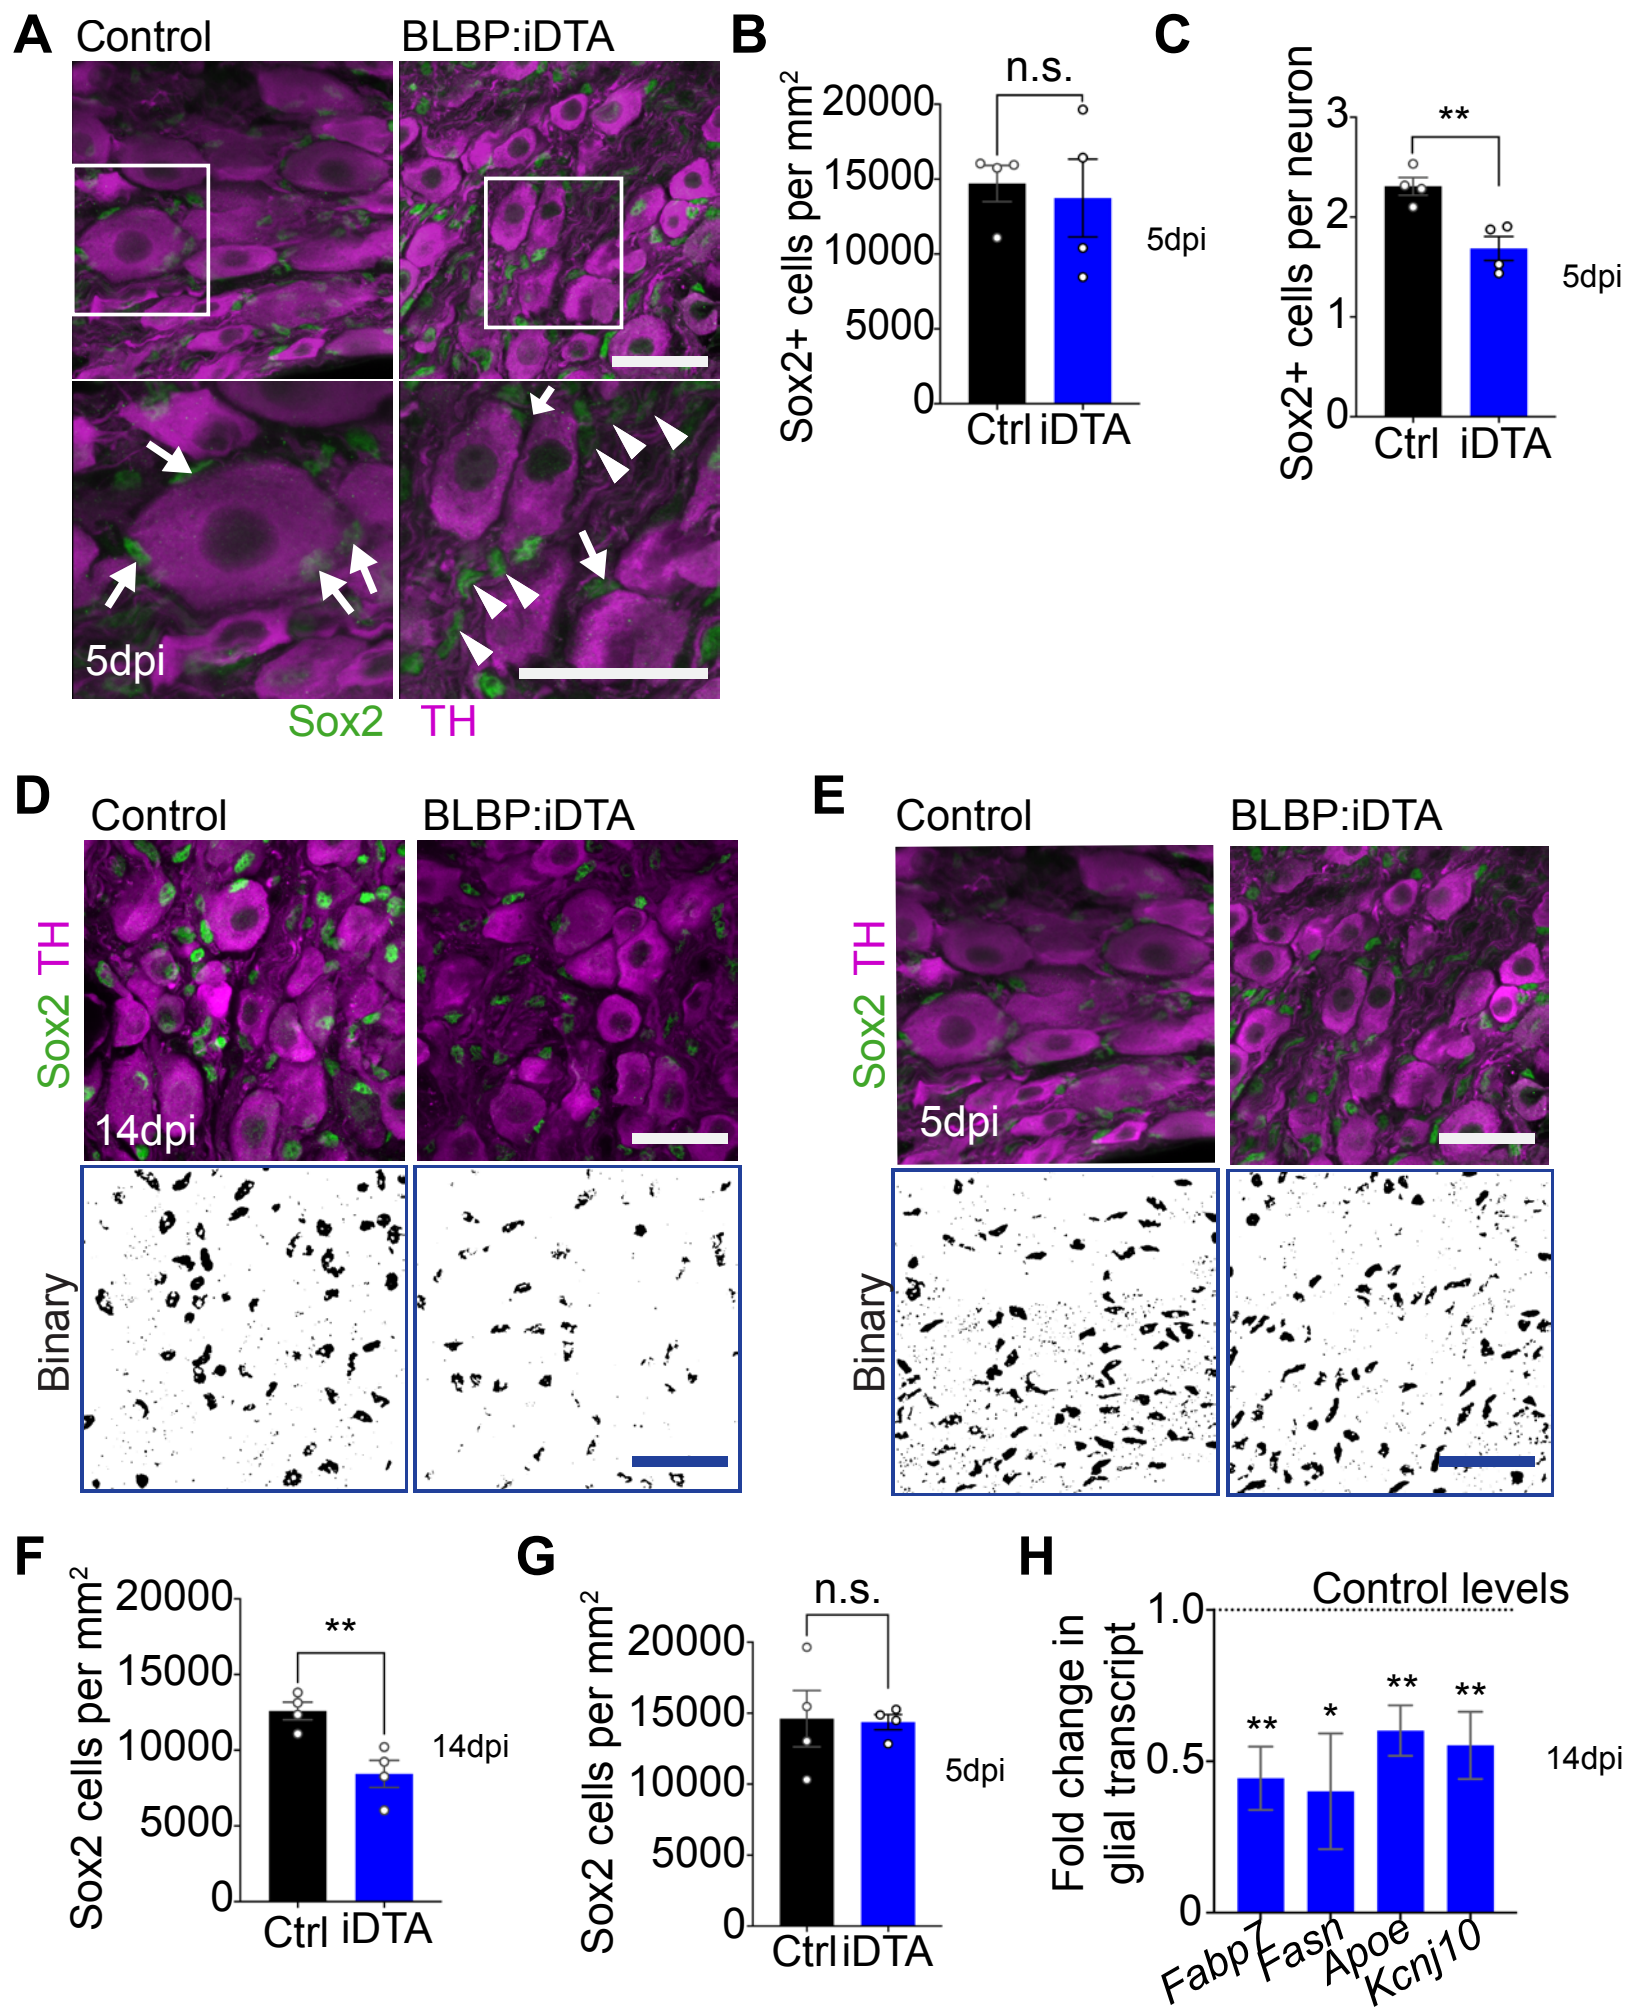

Supplement: supp [file elife-74295-supp-v1.zip]

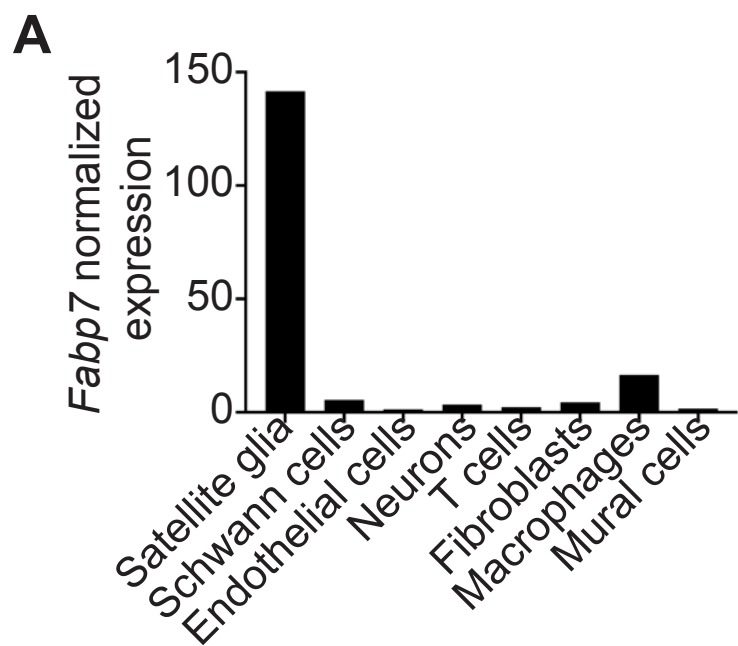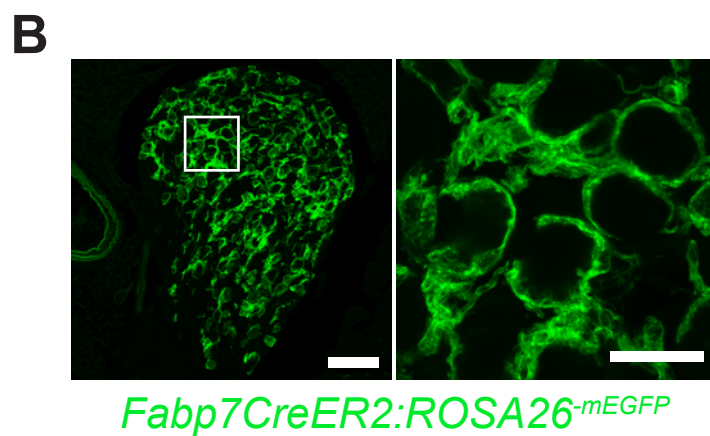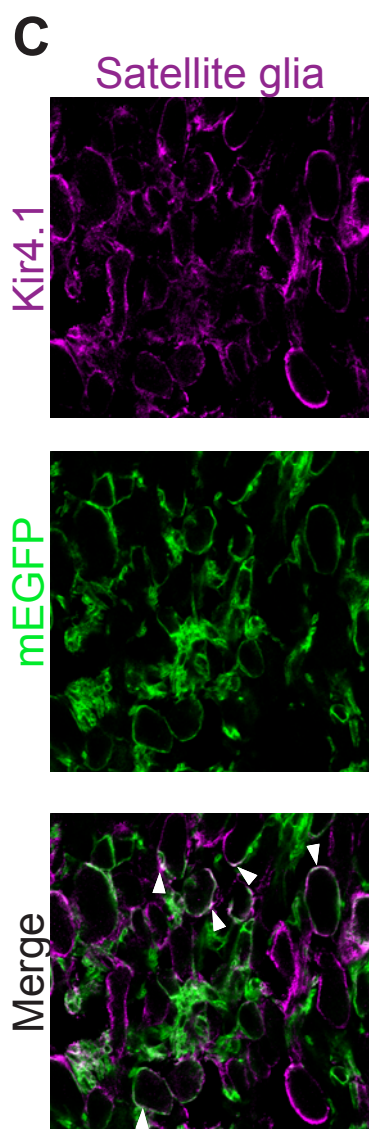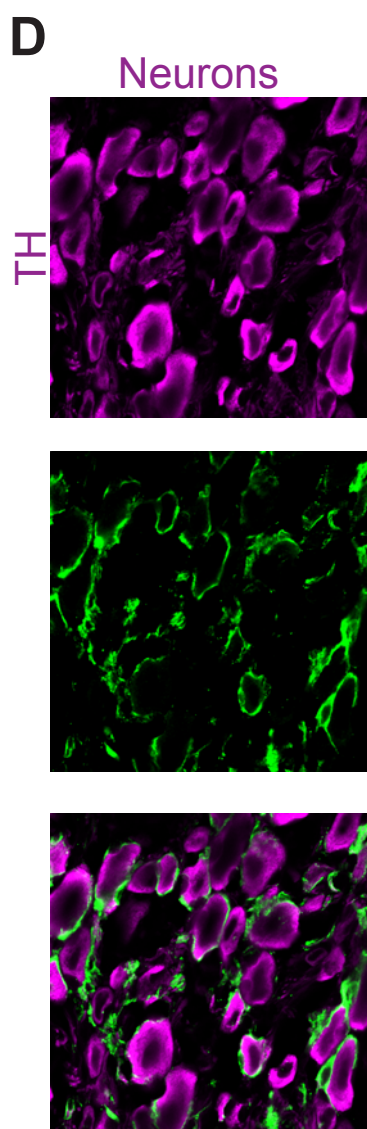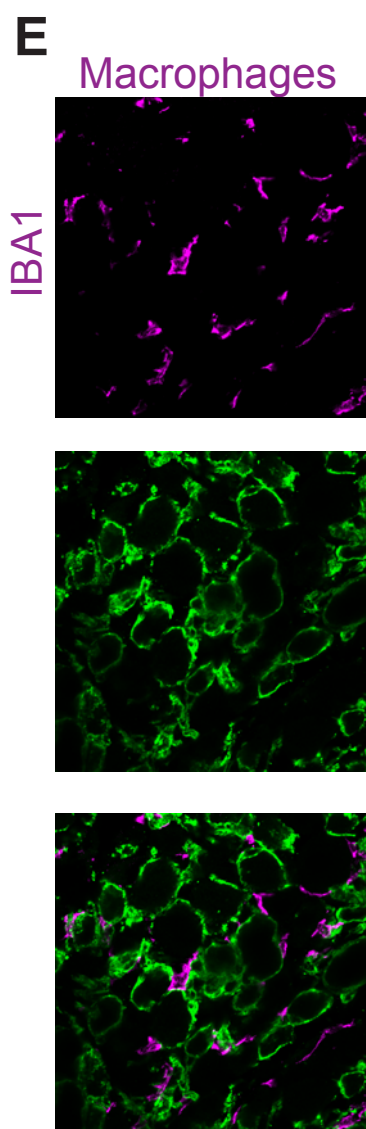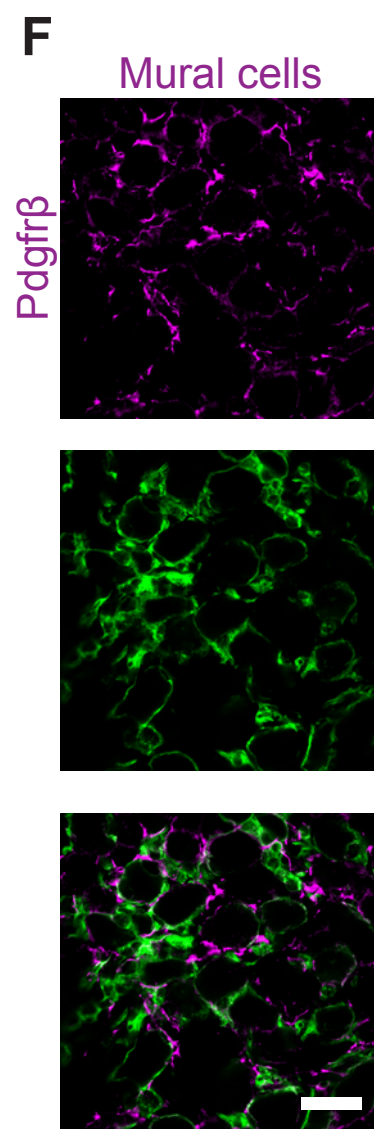

Supplement: supp [file elife-74295-supp-v1.zip]

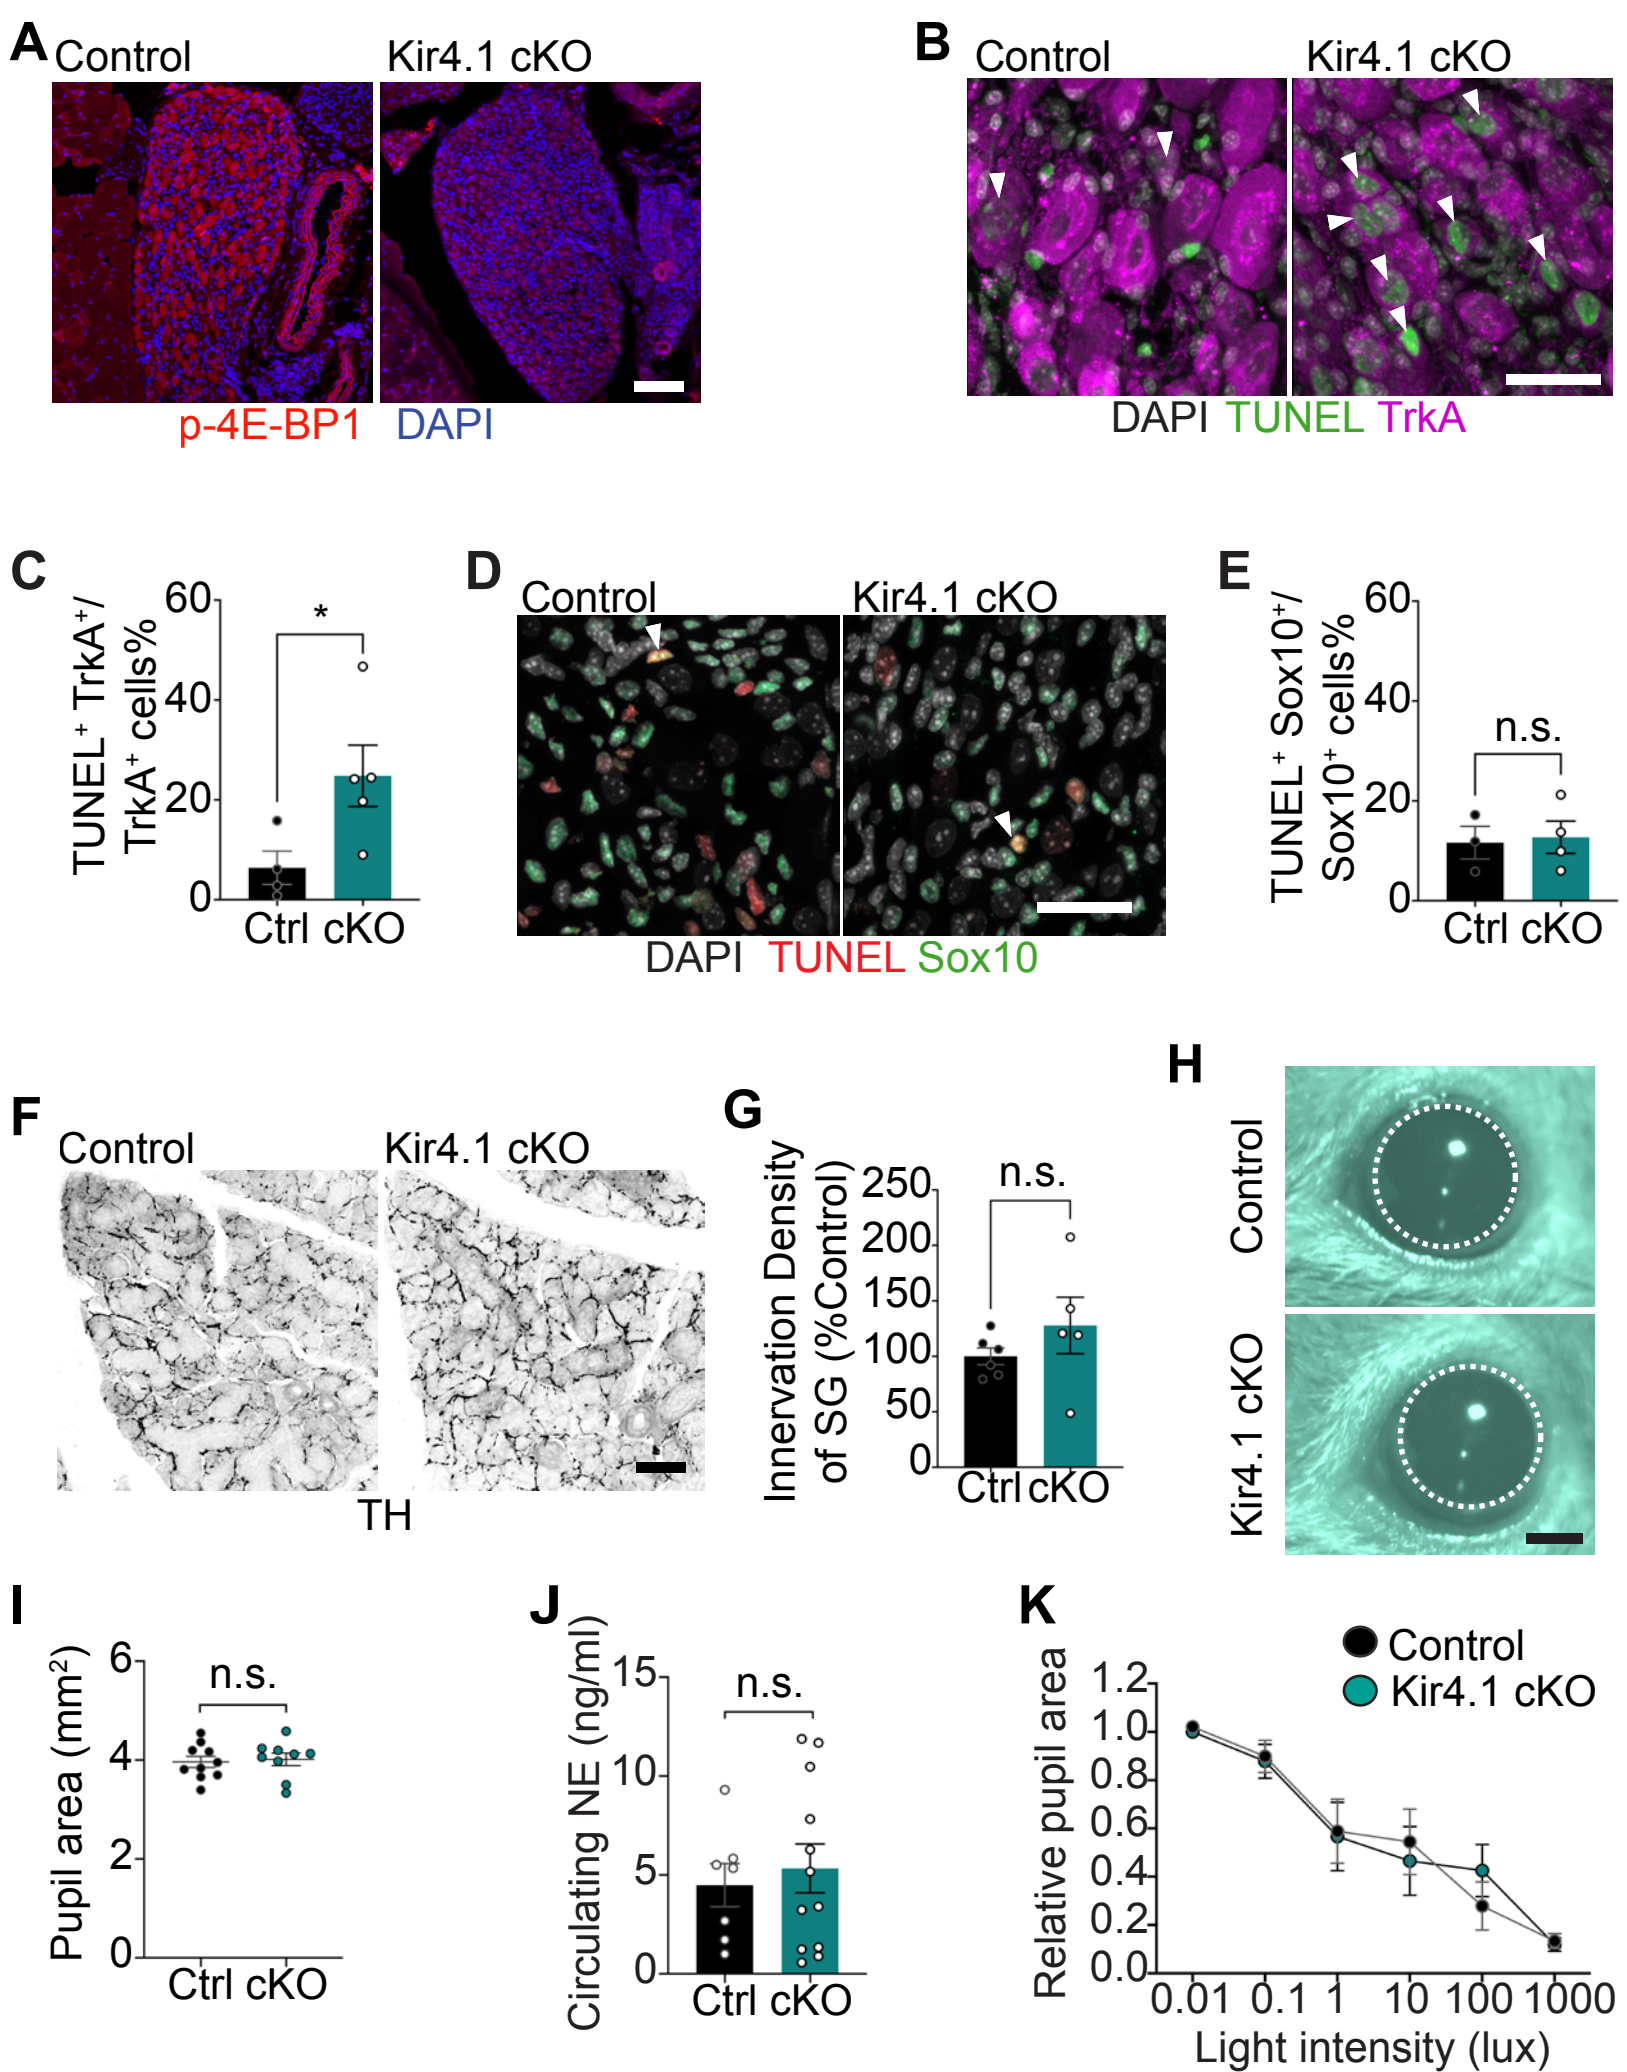

Supplement: supp [file elife-74295-supp-v1.zip]

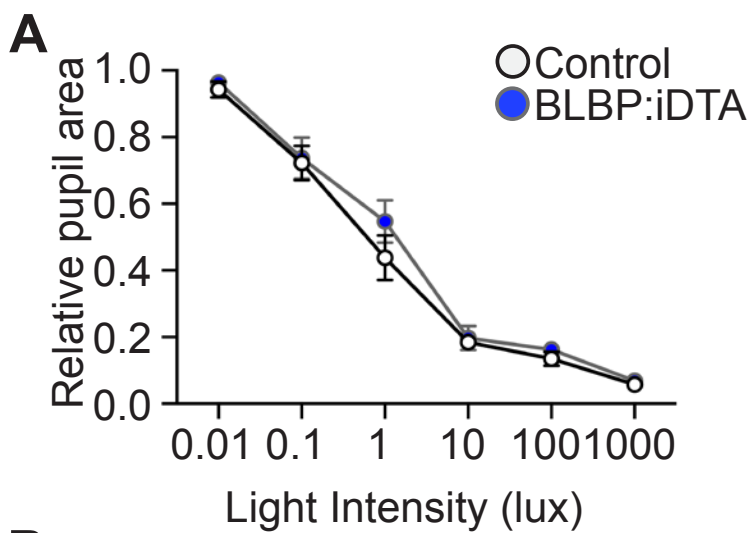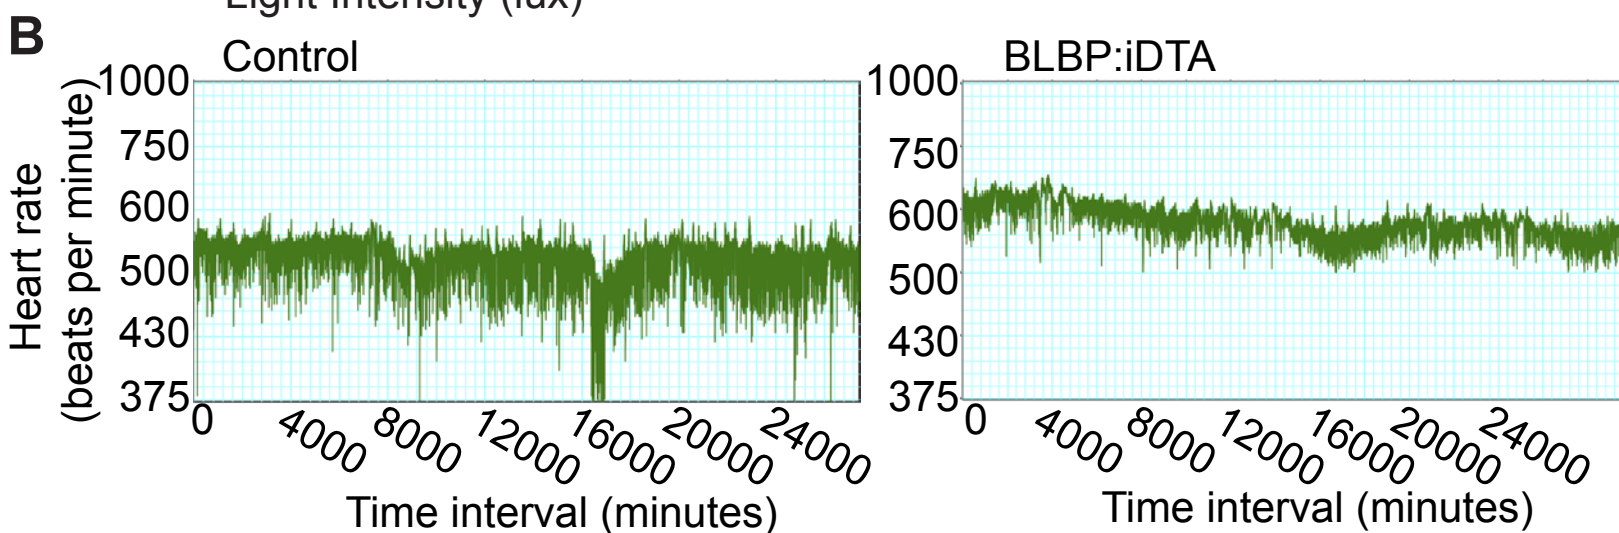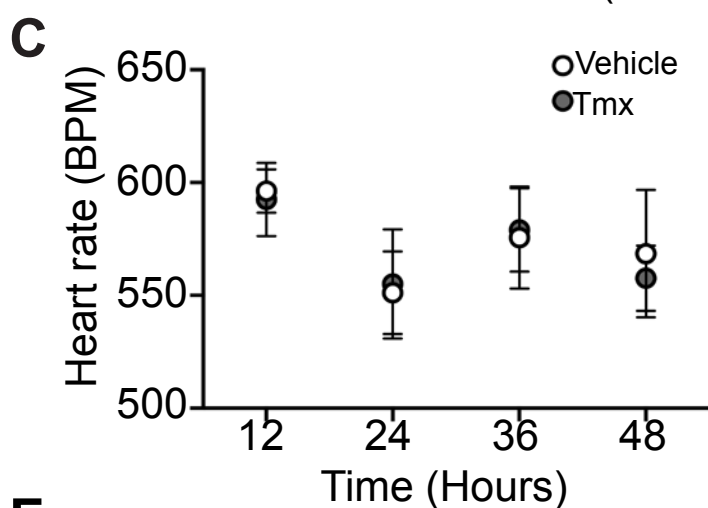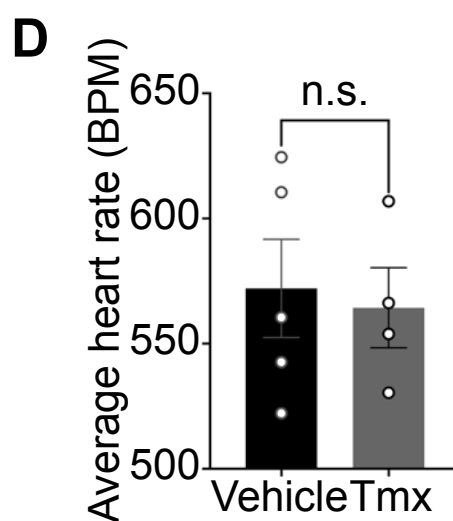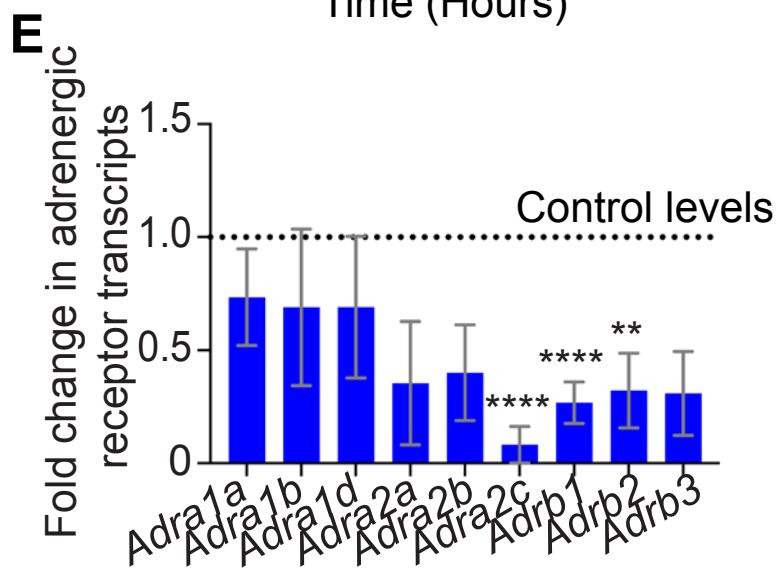

Supplement: supp [file elife-74295-supp-v1.zip]

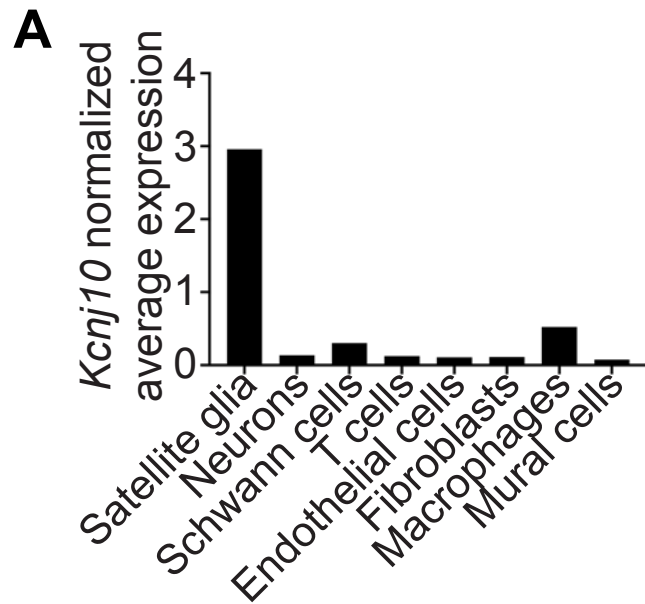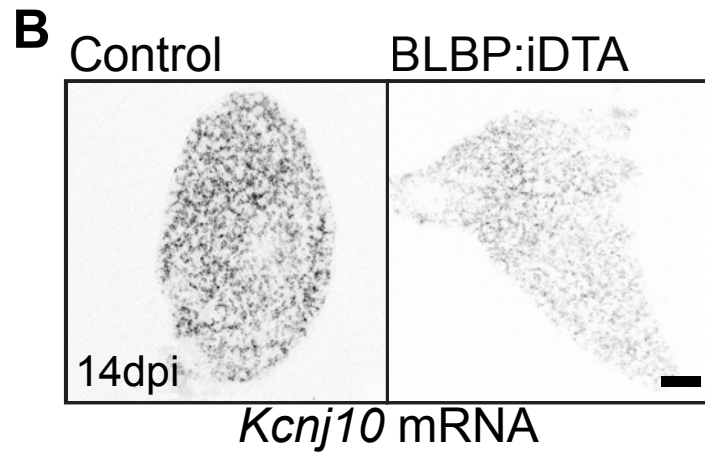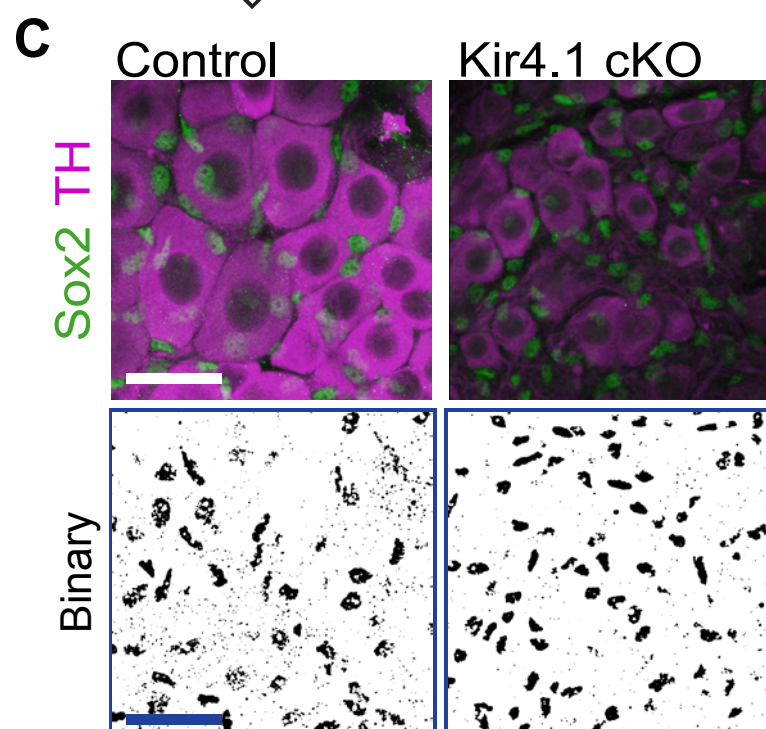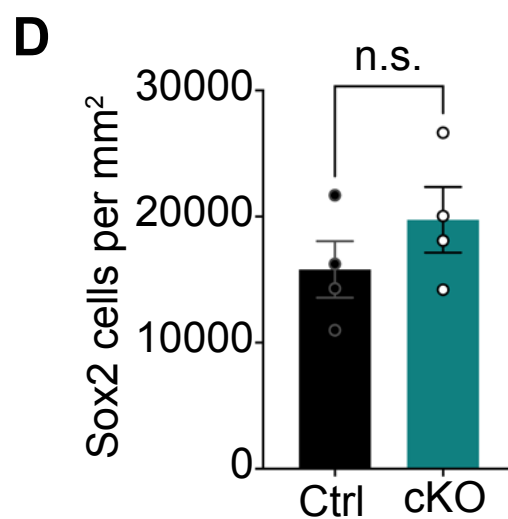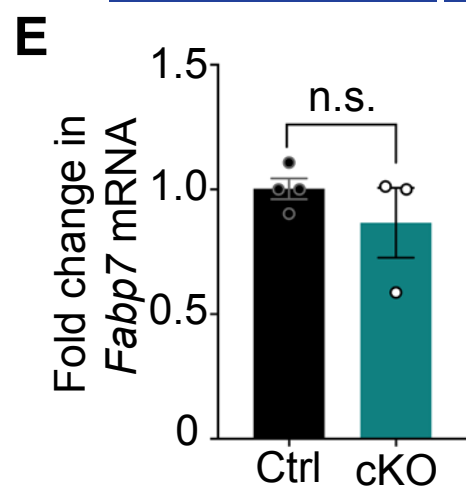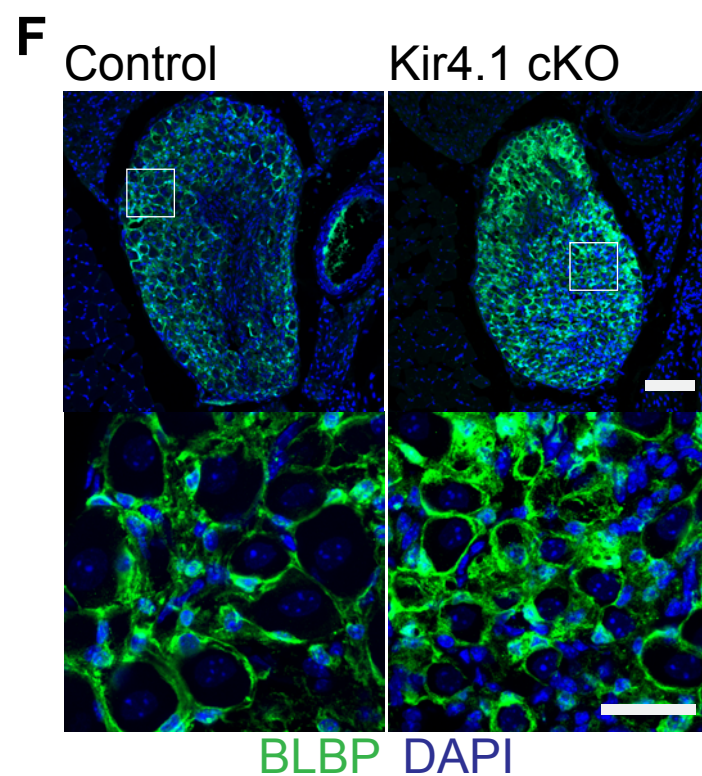

Supplement: supp [file elife-74295-supp-v1.zip]
